# Supplementary material
Source: PubMed Central journal article supplement (PMC5484065)

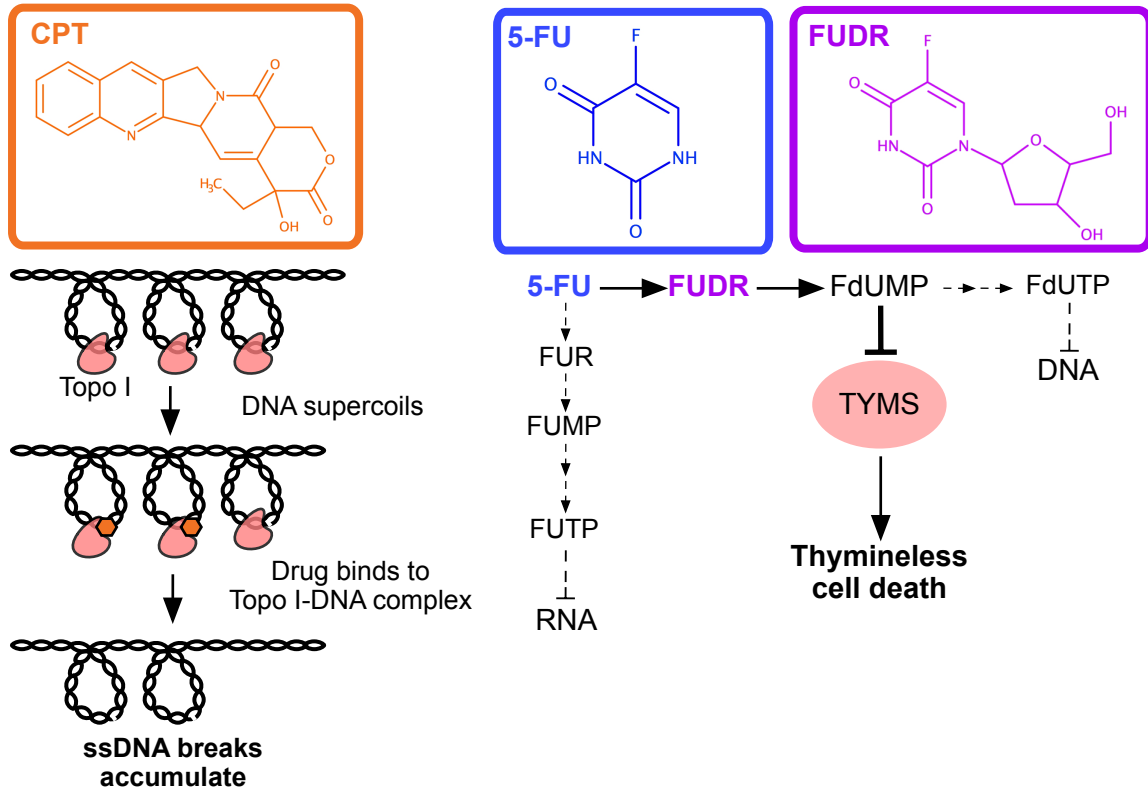

Supplement: NIHMS864843-supplement-2.pdf [file NIHMS864843-supplement-2.pdf]

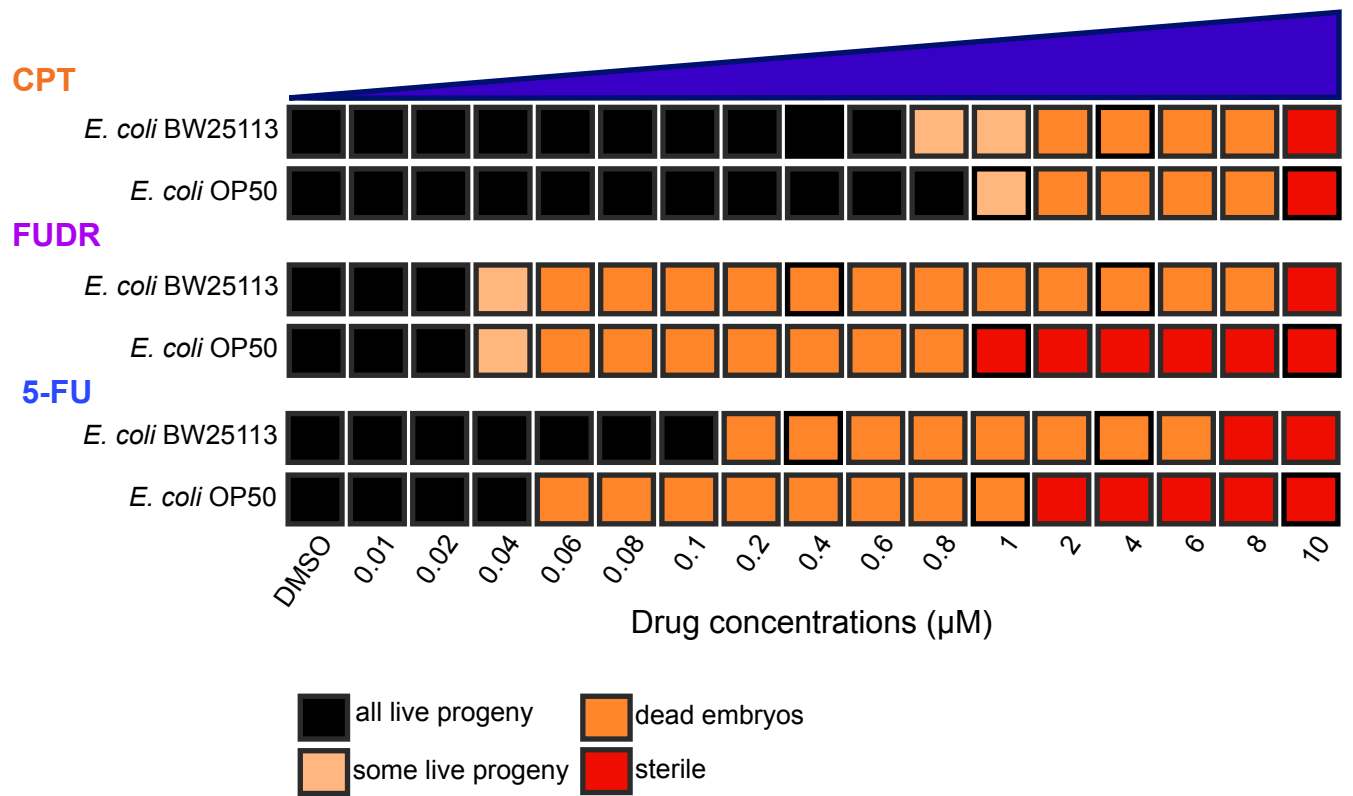

Supplement: NIHMS864843-supplement-3.pdf [file NIHMS864843-supplement-3.pdf]

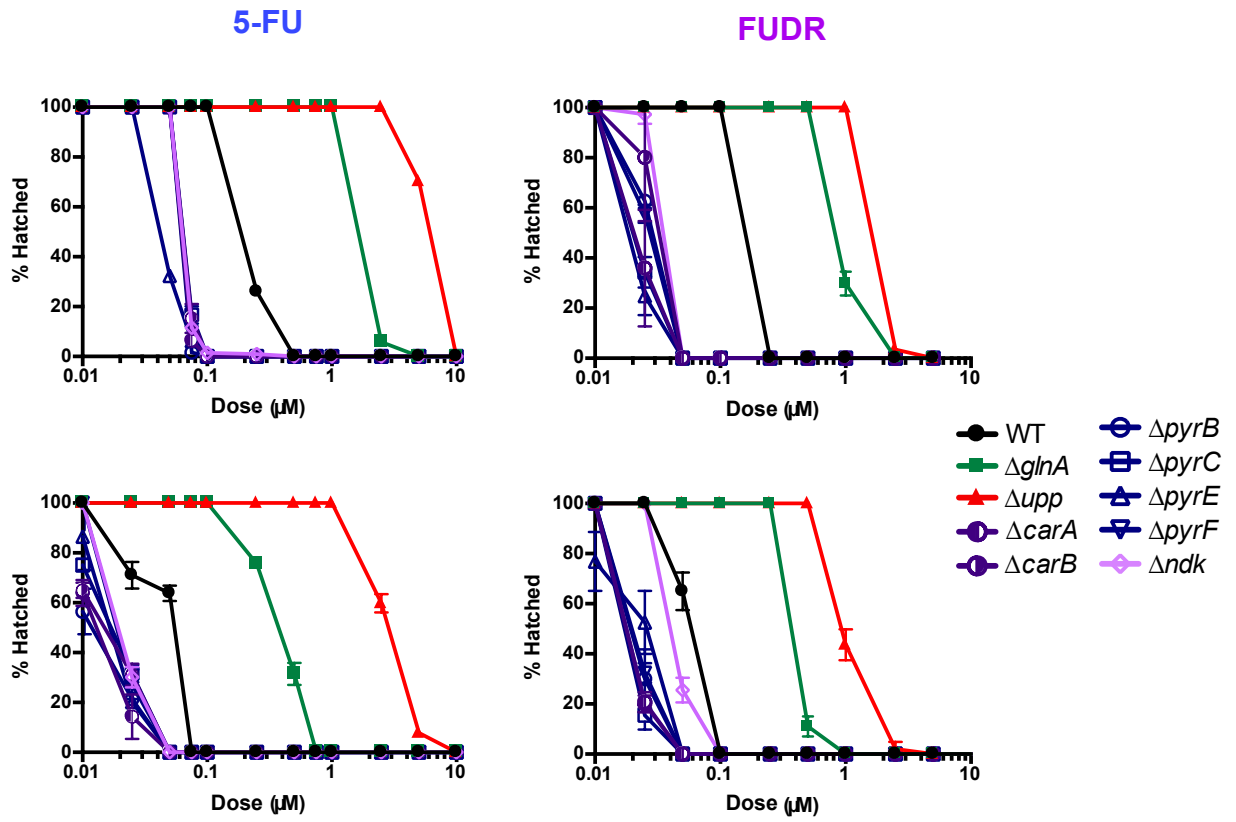

Supplement: NIHMS864843-supplement-5.pdf [file NIHMS864843-supplement-5.pdf]

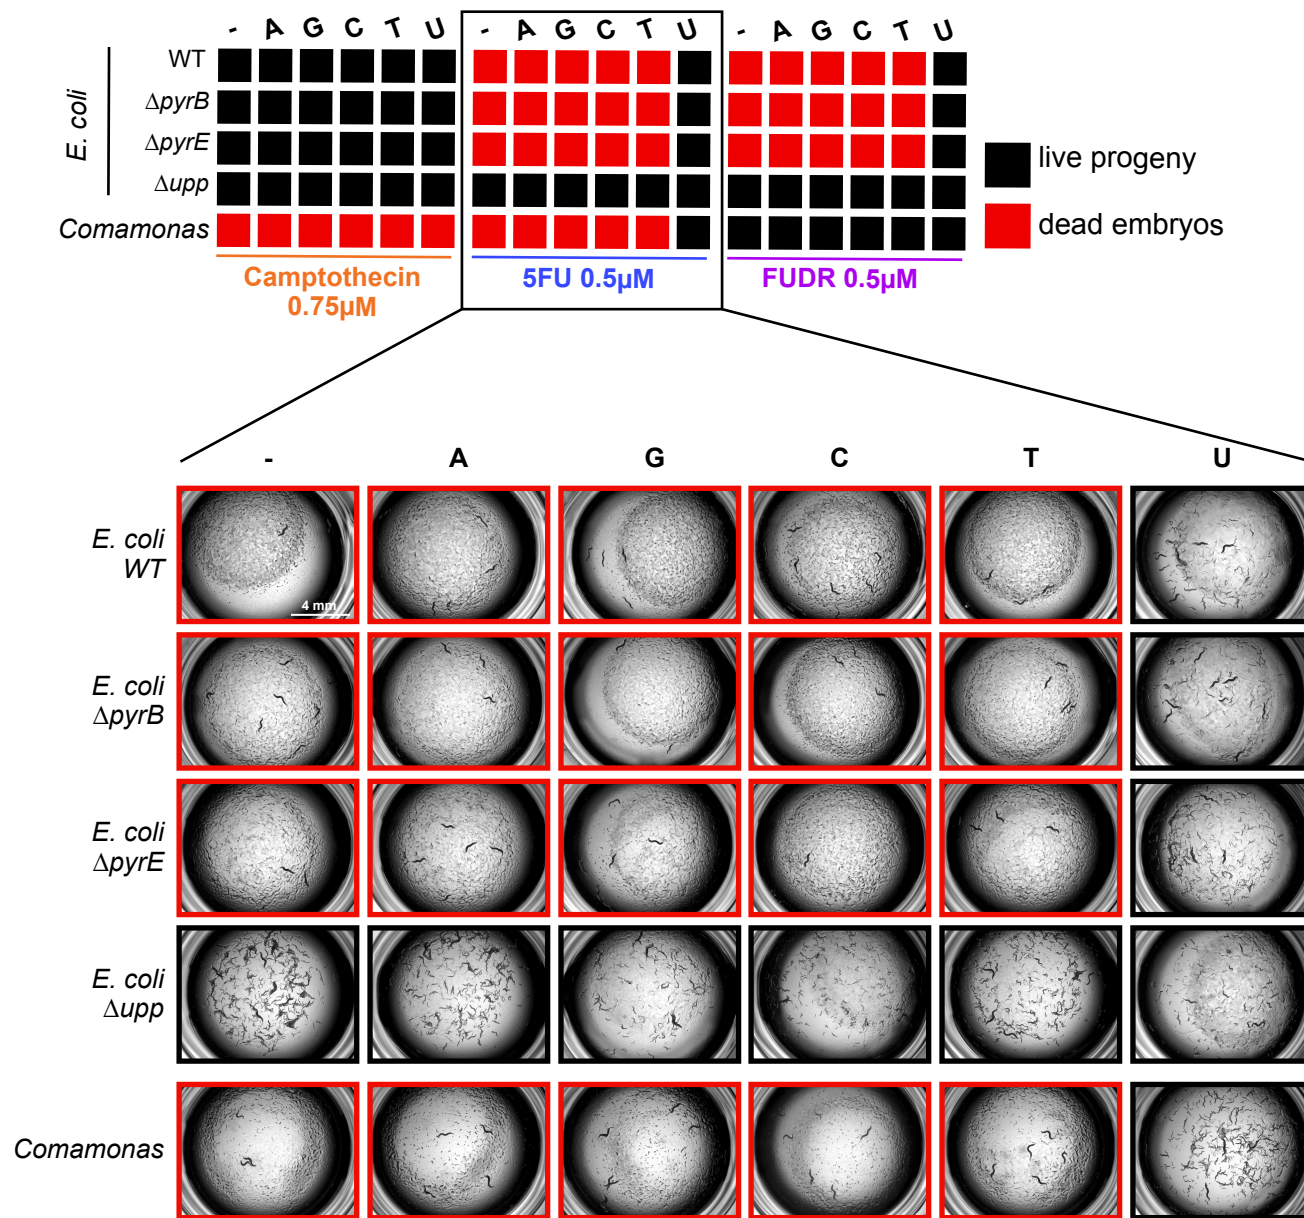

Supplement: NIHMS864843-supplement-6.pdf [file NIHMS864843-supplement-6.pdf]
